# Supplementary material for: New methods for determination of the mass-independent and mass-dependent platinum isotope compositions of iron meteorites by MC-ICP-MS
Source: Royal Society of Chemistry journal article supplement (doi:10.1039/d1ja00468a), 2022-01-01
Supplement: d1ja00468a1.pdf [file d1ja00468a1.pdf]

## Supplementary Data Tables

Table S1  
Mass-independent Pt isotope data for terrestrial standard reference materials

| Reference Material         | $\epsilon^{192}\text{Pt}_{(8/5)}^a$ | $\epsilon^{194}\text{Pt}_{(8/5)}^a$ | $\epsilon^{196}\text{Pt}_{(8/5)}^a$ | $\epsilon^{192}\text{Pt}_{(6/5)}^b$ | $\epsilon^{194}\text{Pt}_{(6/5)}^b$ | $\epsilon^{198}\text{Pt}_{(6/5)}^b$ |
|----------------------------|-------------------------------------|-------------------------------------|-------------------------------------|-------------------------------------|-------------------------------------|-------------------------------------|
| NIST SRM 129c <sup>c</sup> | $-0.20 \pm 1.12$                    | $0.09 \pm 0.12$                     | $0.02 \pm 0.07$                     | $-0.15 \pm 1.13$                    | $0.09 \pm 0.13$                     | $-0.07 \pm 0.22$                    |
|                            | $-0.51 \pm 0.93$                    | $0.14 \pm 0.09$                     | $0.05 \pm 0.08$                     | $-0.54 \pm 1.02$                    | $0.15 \pm 0.13$                     | $-0.14 \pm 0.24$                    |
|                            | $1.99 \pm 0.96$                     | $0.10 \pm 0.09$                     | $0.12 \pm 0.07$                     | $2.06 \pm 1.00$                     | $0.20 \pm 0.13$                     | $-0.36 \pm 0.22$                    |
|                            | $1.84 \pm 1.02$                     | $0.27 \pm 0.11$                     | $0.10 \pm 0.08$                     | $1.79 \pm 1.12$                     | $0.39 \pm 0.14$                     | $-0.28 \pm 0.23$                    |
|                            | $-1.76 \pm 1.40$                    | $-0.14 \pm 0.12$                    | $-0.06 \pm 0.07$                    | $-1.64 \pm 1.41$                    | $-0.16 \pm 0.15$                    | $0.17 \pm 0.22$                     |
|                            | $0.32 \pm 0.91$                     | $0.02 \pm 0.12$                     | $0.14 \pm 0.08$                     | $0.46 \pm 0.86$                     | $0.13 \pm 0.13$                     | $-0.43 \pm 0.25$                    |
|                            | $-0.48 \pm 1.13$                    | $0.18 \pm 0.10$                     | $0.10 \pm 0.07$                     | $-0.56 \pm 1.09$                    | $0.31 \pm 0.12$                     | $-0.29 \pm 0.20$                    |
|                            | $-0.22 \pm 1.10$                    | $0.00 \pm 0.10$                     | $0.11 \pm 0.07$                     | $-0.05 \pm 1.11$                    | $0.02 \pm 0.12$                     | $-0.33 \pm 0.20$                    |
|                            | $2.85 \pm 1.07$                     | $0.17 \pm 0.10$                     | $0.13 \pm 0.10$                     | $3.17 \pm 1.01$                     | $0.36 \pm 0.11$                     | $-0.40 \pm 0.28$                    |
|                            | $2.47 \pm 1.17$                     | $0.13 \pm 0.09$                     | $0.13 \pm 0.08$                     | $2.33 \pm 1.25$                     | $0.16 \pm 0.13$                     | $-0.39 \pm 0.23$                    |
|                            | $0.81 \pm 0.95$                     | $0.06 \pm 0.15$                     | $0.06 \pm 0.09$                     | $0.75 \pm 0.96$                     | $0.18 \pm 0.15$                     | $-0.18 \pm 0.26$                    |
|                            | $-1.56 \pm 1.07$                    | $0.01 \pm 0.10$                     | $0.27 \pm 0.07$                     | $-0.86 \pm 1.05$                    | $0.37 \pm 0.13$                     | $-0.80 \pm 0.22$                    |
|                            | $2.87 \pm 1.09$                     | $0.09 \pm 0.15$                     | $0.11 \pm 0.08$                     | $3.80 \pm 1.12$                     | $0.21 \pm 0.19$                     | $-0.34 \pm 0.24$                    |
|                            | $0.40 \pm 1.15$                     | $0.13 \pm 0.17$                     | $0.01 \pm 0.09$                     | $0.87 \pm 1.09$                     | $0.17 \pm 0.18$                     | $-0.04 \pm 0.27$                    |
|                            | $0.53 \pm 1.13$                     | $-0.02 \pm 0.11$                    | $0.05 \pm 0.09$                     | $0.66 \pm 1.15$                     | $0.02 \pm 0.14$                     | $-0.15 \pm 0.27$                    |
|                            | $0.13 \pm 1.31$                     | $-0.06 \pm 0.10$                    | $0.11 \pm 0.09$                     | $0.52 \pm 1.32$                     | $0.12 \pm 0.14$                     | $-0.33 \pm 0.26$                    |
|                            | $2.77 \pm 1.01$                     | $0.04 \pm 0.09$                     | $0.02 \pm 0.08$                     | $2.74 \pm 1.07$                     | $0.01 \pm 0.13$                     | $-0.05 \pm 0.23$                    |
|                            | $1.13 \pm 1.09$                     | $0.03 \pm 0.11$                     | $0.07 \pm 0.09$                     | $1.00 \pm 1.00$                     | $-0.07 \pm 0.18$                    | $-0.22 \pm 0.28$                    |
|                            | $-0.41 \pm 1.10$                    | $0.08 \pm 0.12$                     | $0.19 \pm 0.09$                     | $0.44 \pm 1.09$                     | $0.27 \pm 0.14$                     | $-0.57 \pm 0.26$                    |
| <b>Mean (n = 19)</b>       | <b><math>0.68 \pm 2.88</math></b>   | <b><math>0.07 \pm 0.19</math></b>   | <b><math>0.09 \pm 0.14</math></b>   | <b><math>0.89 \pm 2.89</math></b>   | <b><math>0.15 \pm 0.30</math></b>   | <b><math>-0.27 \pm 0.43</math></b>  |
| Pt- $\alpha$               | $-0.41 \pm 0.98$                    | $-0.10 \pm 0.13$                    | $-0.02 \pm 0.08$                    | $-0.50 \pm 0.99$                    | $-0.06 \pm 0.15$                    | $0.05 \pm 0.25$                     |
|                            | $-2.85 \pm 1.07$                    | $-0.07 \pm 0.11$                    | $0.20 \pm 0.08$                     | $-2.32 \pm 1.14$                    | $0.12 \pm 0.13$                     | $-0.60 \pm 0.23$                    |
|                            | $-0.27 \pm 1.40$                    | $0.03 \pm 0.08$                     | $0.19 \pm 0.10$                     | $0.40 \pm 1.36$                     | $0.19 \pm 0.14$                     | $-0.57 \pm 0.29$                    |
|                            | $1.86 \pm 1.01$                     | $-0.02 \pm 0.14$                    | $0.09 \pm 0.08$                     | $1.80 \pm 1.09$                     | $0.06 \pm 0.14$                     | $-0.25 \pm 0.25$                    |
|                            | $-0.25 \pm 1.32$                    | $-0.03 \pm 0.11$                    | $-0.07 \pm 0.08$                    | $-0.32 \pm 1.32$                    | $-0.06 \pm 0.15$                    | $0.21 \pm 0.25$                     |
|                            | $-0.52 \pm 1.53$                    | $-0.05 \pm 0.13$                    | $0.01 \pm 0.10$                     | $-0.76 \pm 1.60$                    | $-0.09 \pm 0.15$                    | $-0.03 \pm 0.30$                    |
| <b>Mean (n = 7)</b>        | <b><math>-0.41 \pm 2.99</math></b>  | <b><math>-0.04 \pm 0.09</math></b>  | <b><math>0.07 \pm 0.22</math></b>   | <b><math>-0.28 \pm 2.72</math></b>  | <b><math>0.03 \pm 0.23</math></b>   | <b><math>-0.20 \pm 0.67</math></b>  |

<sup>a</sup> Normalised to  $^{198}\text{Pt}/^{195}\text{Pt} = 0.216277$  using the exponential law,  $\epsilon^i\text{Pt} = [(^i\text{Pt}/^{195}\text{Pt})_{\text{smp}}/(^i\text{Pt}/^{195}\text{Pt})_{\text{std}} - 1] \times 10^4$ ;

<sup>b</sup> Normalised to  $^{196}\text{Pt}/^{195}\text{Pt} = 0.748446$  using the exponential law,  $\epsilon^i\text{Pt} = [(^i\text{Pt}/^{195}\text{Pt})_{\text{smp}}/(^i\text{Pt}/^{195}\text{Pt})_{\text{std}} - 1] \times 10^4$ ; <sup>c</sup> SRM doped with IRMM-010 Pt; Uncertainties of individual measurements are  $\pm 2\text{se}$  within-run precisions; uncertainties of reported means are  $\pm 2\text{sd}$ .

Table S2  
 Mass-dependent Pt isotope data for terrestrial  
 standard reference materials

| Reference Material         | $\delta^{198}\text{Pt}$ |
|----------------------------|-------------------------|
| NIST SRM 129c <sup>a</sup> | 0.03 ± 0.05             |
|                            | -0.05 ± 0.04            |
|                            | 0.01 ± 0.06             |
|                            | 0.05 ± 0.06             |
|                            | -0.03 ± 0.05            |
|                            | -0.03 ± 0.06            |
|                            | 0.00 ± 0.06             |
|                            | 0.01 ± 0.06             |
|                            | 0.00 ± 0.05             |
|                            | 0.03 ± 0.05             |
|                            | -0.04 ± 0.05            |
|                            | -0.02 ± 0.05            |
| <b>Mean (n = 12)</b>       | <b>0.00 ± 0.06</b>      |
| Pt- $\alpha$               | -0.06 ± 0.05            |
|                            | -0.07 ± 0.05            |
|                            | -0.07 ± 0.06            |
|                            | -0.04 ± 0.07            |
|                            | -0.09 ± 0.06            |
|                            | -0.07 ± 0.05            |
|                            | -0.08 ± 0.05            |
| <b>Mean (n = 7)</b>        | <b>-0.07 ± 0.03</b>     |

<sup>a</sup> SRM doped with IRMM-010 Pt; All uncertainties are 2 $\sigma$ .
